# Supplementary material for: A Novel Cytotoxic Conjugate Derived from the Natural Product Podophyllotoxin as a Direct-Target Protein Dual Inhibitor
Source: PubMed Central journal article supplement (PMC7571232; doi:10.3390/molecules25184258), 2020-09-17
Supplement: molecules-25-04258-s001.pdf [file molecules-25-04258-s001.pdf]

## Supplementary Material

**Table S1.** Numerical distribution (%) of annexin- and annexin+ cells in the apoptosis assay.

|                          | Cell Line | Annexin - | Annexin + |       |       |
|--------------------------|-----------|-----------|-----------|-------|-------|
|                          |           |           | Total     | PI-   | PI+   |
| Control                  | MG-63     | 89.58     | 10.42     | 33.32 | 66.68 |
|                          | HT-29     | 94.70     | 5.30      | 22.55 | 77.45 |
|                          | MCF-7     | 91.86     | 8.14      | 17.76 | 86.24 |
| Podophyllic aldehyde (2) | MG-63     | 36.15     | 63.85     | 81.29 | 18.71 |
|                          | HT-29     | 84.17     | 15.83     | 84.48 | 15.52 |
|                          | MCF-7     | 83.50     | 16.50     | 89.04 | 10.96 |
| 7-cyclolignan 3          | MG-63     | 34.98     | 65.02     | 86.62 | 13.38 |
|                          | HT-29     | 25.36     | 74.64     | 83.63 | 16.38 |
|                          | MCF-7     | 10.24     | 89.76     | 21.96 | 78.04 |
| Hybrid 4                 | MG-63     | 5.32      | 94.68     | 82.33 | 17.77 |
|                          | HT-29     | 74.60     | 25.40     | 74.60 | 25.40 |
|                          | MCF-7     | 65.23     | 34.77     | 14.85 | 85.15 |

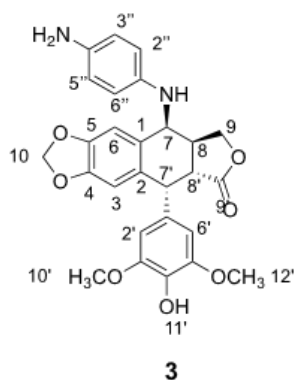

**Table S2.** <sup>1</sup>H NMR data for compound 3.

| H       | 3                   |                     |
|---------|---------------------|---------------------|
| 3       | 6.45 <i>s</i>       |                     |
| 6       | 6.70 <i>s</i>       |                     |
| 7       | 4.53 <i>d</i> (4.8) |                     |
| 8       | 2.85 <i>m</i>       |                     |
| 9       | 4.29 <i>m</i>       |                     |
| 10      | 3.09 <i>m</i>       |                     |
| 10      | 5.90 <i>s</i>       |                     |
| 2'6'    | 6.26 <i>s</i>       |                     |
| 7'      | 4.39 <i>sa</i>      |                     |
| 8'      | 2.79 <i>m</i>       |                     |
| 10' 12' | 3.72 <i>s</i>       |                     |
| linker  | 2'', 6''            | 6.58 <i>d</i> (8.0) |
|         | 3'', 5''            | 6.36 <i>d</i> (8.0) |

**Table S3.** <sup>13</sup>C NMR data for compound 3.

| C | 3 |
|---|---|
|---|---|

|                       |       |
|-----------------------|-------|
| <b>1</b>              | 132.1 |
| <b>2</b>              | 131.8 |
| <b>3</b>              | 110.5 |
| <b>4</b>              | 146.4 |
| <b>5</b>              | 147.4 |
| <b>6</b>              | 108.9 |
| <b>7</b>              | 66.7  |
| <b>8</b>              | 38.1  |
| <b>9</b>              | 67.6  |
| <b>10</b>             | 101.5 |
| <b>1'</b>             | 132.0 |
| <b>2'6'</b>           | 107.8 |
| <b>3'5'</b>           | 148.6 |
| <b>4'</b>             | 134.0 |
| <b>7'</b>             | 43.7  |
| <b>8'</b>             | 40.6  |
| <b>9'</b>             | 175.1 |
| <b>10' 12'</b>        | 56.5  |
| <b>1''</b>            | 147.4 |
| <b>linker 2'',6''</b> | 122.6 |
| <b>3'',5''</b>        | 148.6 |
| <b>4''</b>            | 148.6 |

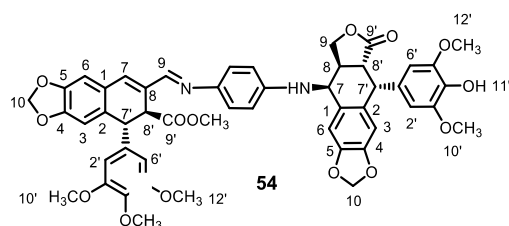

**Table S4.** <sup>1</sup>H NMR data for compound **4**.

| H                              | <b>4</b>                     |                        |                                     | H           |
|--------------------------------|------------------------------|------------------------|-------------------------------------|-------------|
|                                | Podophyllin<br>aldehyde rest | linker                 | 4'-desmethyl-<br>epipodophyllotoxin |             |
| <b>3</b>                       | 6.61s                        | 6.46 <i>d</i><br>(8.8) | 6.46 <i>s</i>                       | <b>3</b>    |
| <b>6</b>                       | 6.73 <i>s</i>                | 7.03 <i>d</i><br>(8.8) | 6.70 <i>s</i>                       | <b>6</b>    |
| <b>7</b>                       | 6.91 <i>s</i>                |                        | 4.53 <i>d</i> (5.2)                 | <b>7</b>    |
| <b>8</b>                       |                              |                        | 2.85 <i>m</i>                       | <b>8</b>    |
| <b>9</b>                       | 8.18 <i>s</i>                |                        | 4.30 <i>m</i>                       | <b>9</b>    |
| <b>10</b>                      | 5.91 <i>s</i>                |                        | 3.09 <i>m</i>                       | <b>10</b>   |
| <b>2'6'</b>                    | 6.28 <i>s</i>                |                        | 5.90 <i>s</i>                       | <b>10</b>   |
| <b>7'</b>                      | 4.50 <i>d</i> (3.2)          |                        | 6.26 <i>s</i>                       | <b>2'6'</b> |
| <b>8'</b>                      | 4.36 <i>d</i> (3.2)          |                        | 4.39 <i>br s</i>                    | <b>7'</b>   |
| <b>10' 12'</b>                 | 3.71 <i>s</i>                |                        | 2.79 <i>m</i>                       | <b>8'</b>   |
| <b>11'</b>                     | 3.74 <i>s</i>                |                        | 3.72 <i>s</i>                       | <b>10'</b>  |
| <b>9'-<br/>OCH<sub>3</sub></b> | 3.60 <i>s</i>                |                        |                                     | <b>12'</b>  |

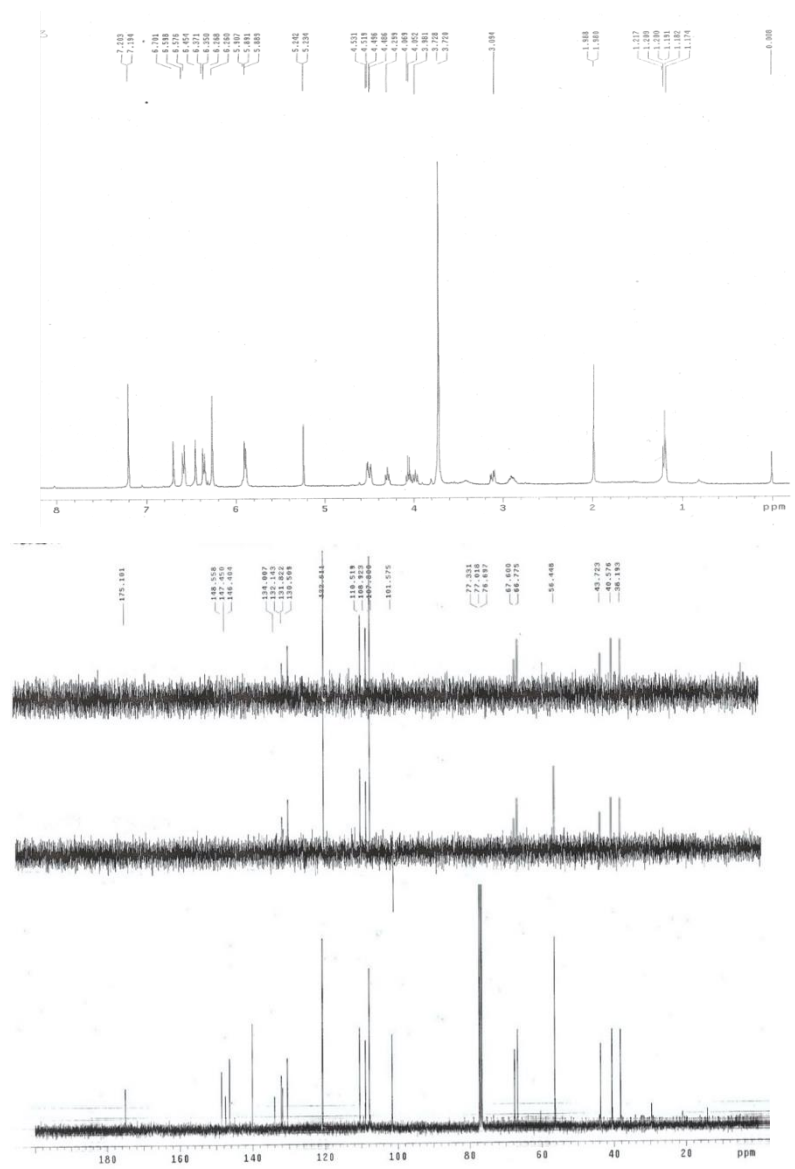

Figure S1. <sup>1</sup>H and <sup>13</sup>C NMR spectra for compound 3 (CDCl<sub>3</sub>).

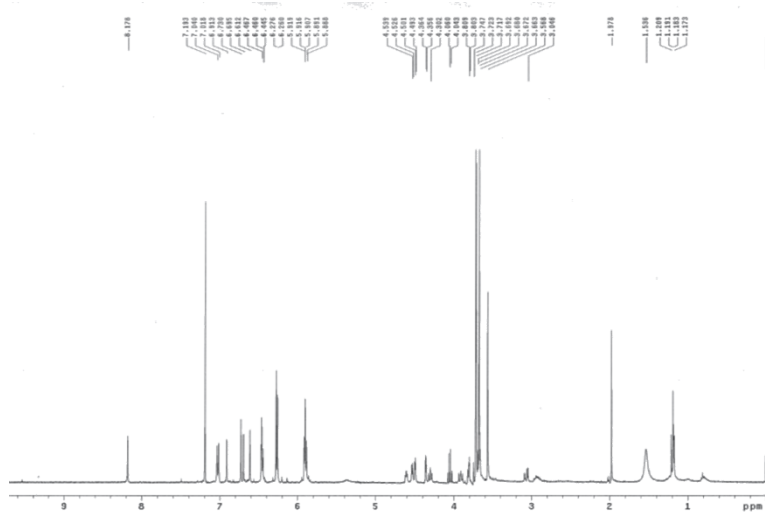

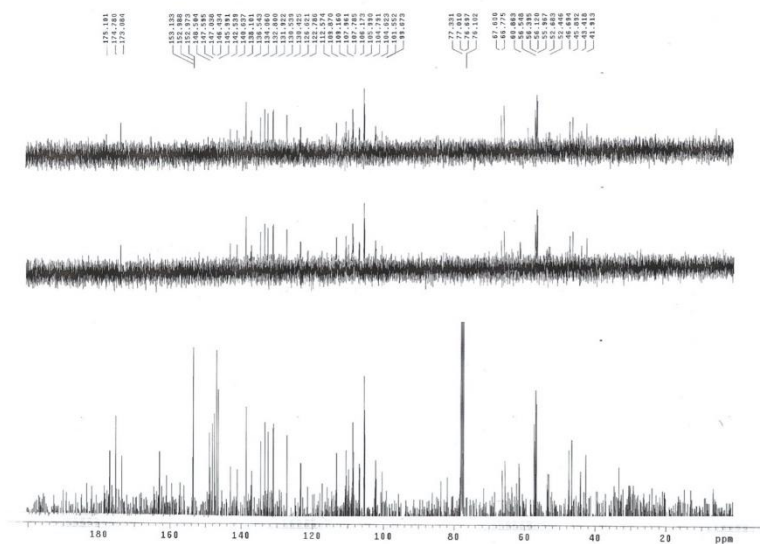

**Figure S2.**  $^1\text{H}$  and  $^{13}\text{C}$  NMR spectra for compound **4** ( $\text{CDCl}_3$ ).
